# Supplementary material for: Ferutinin induces osteoblast differentiation of DPSCs via induction of KLF2 and autophagy/mitophagy
Source: PubMed Central journal article supplement (PMC9098908; doi:10.1038/s41419-022-04903-9), 2022-05-12
Supplement: 41419_2022_4903_MOESM3_ESM.pdf [file 41419_2022_4903_MOESM3_ESM.pdf]

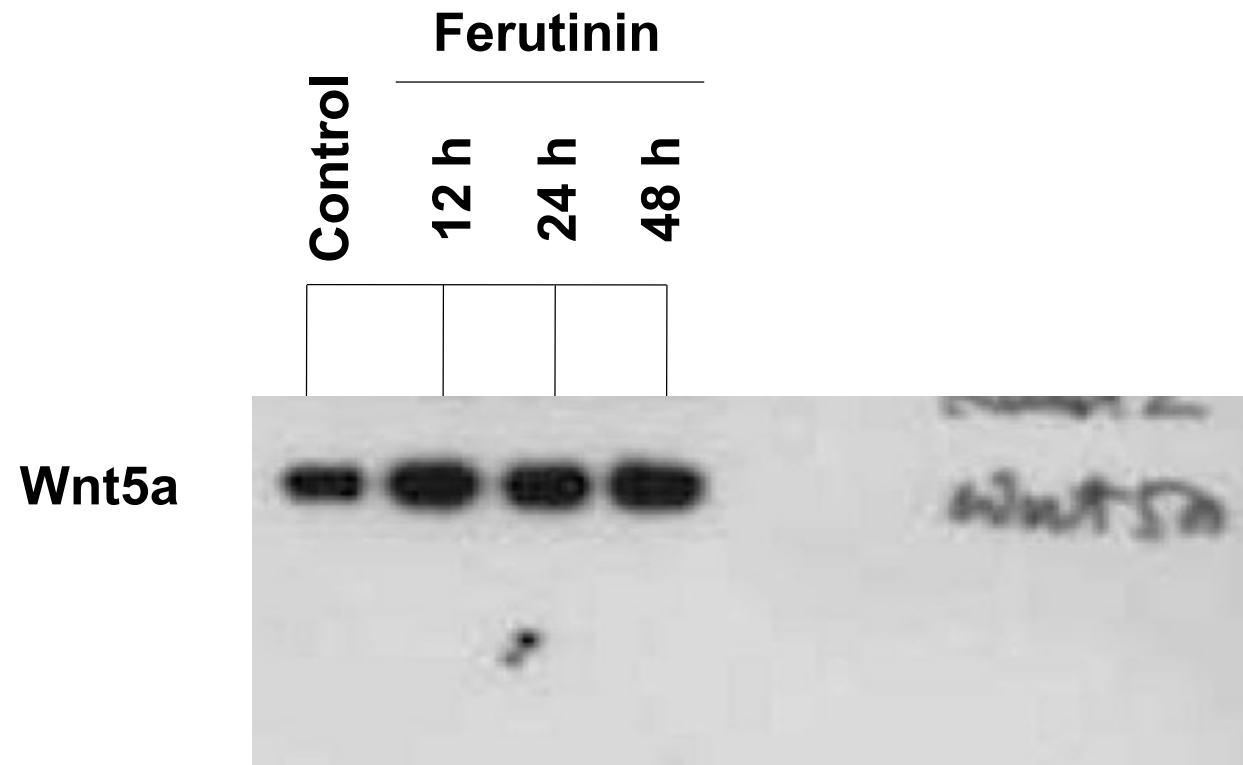

**Figure 1**



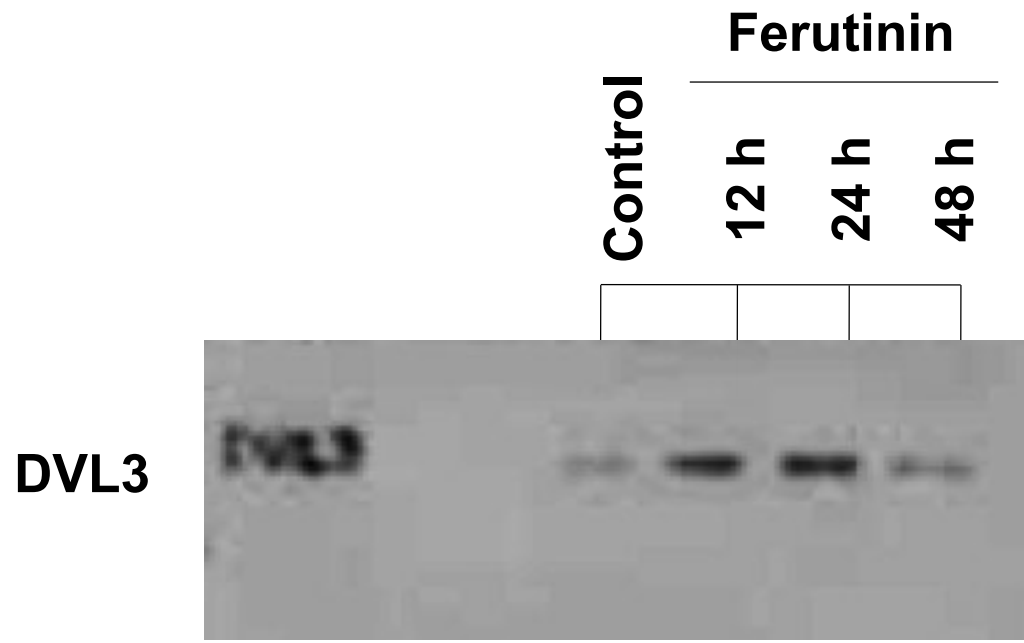

**Figure 1**



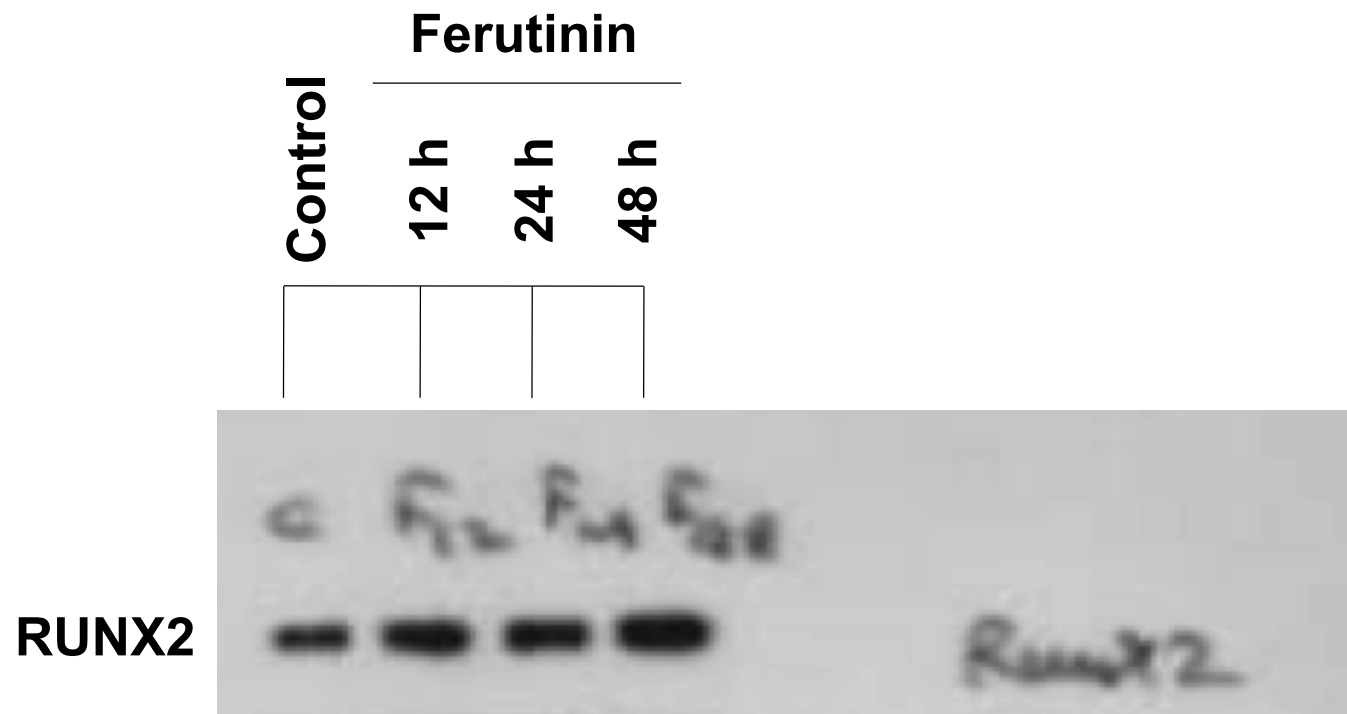

Figure 1

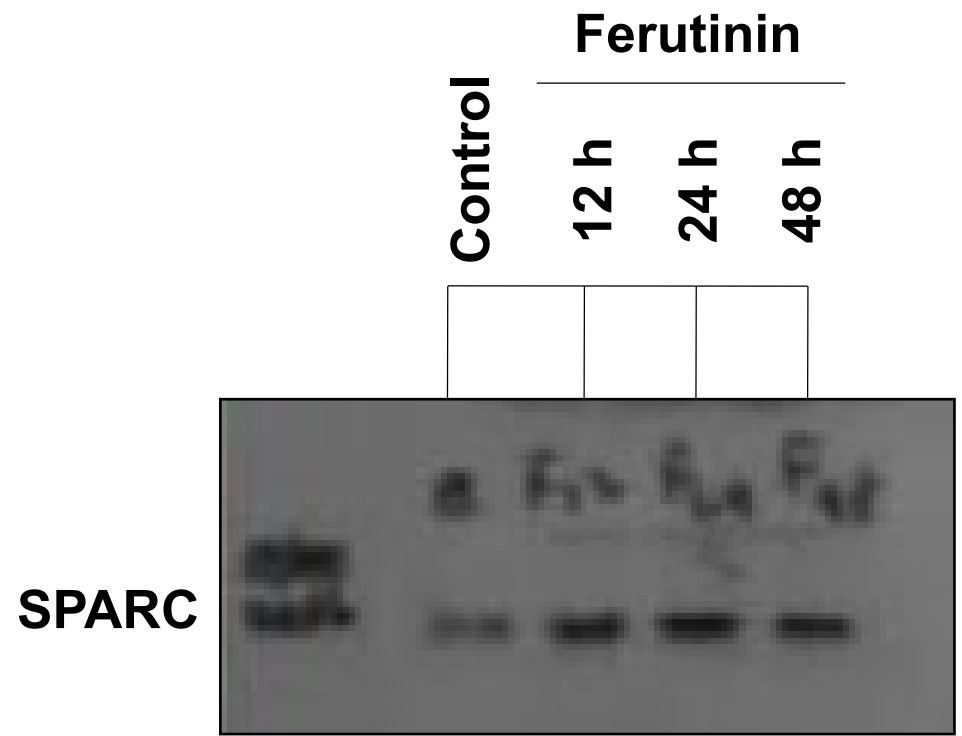

**Figure 1**

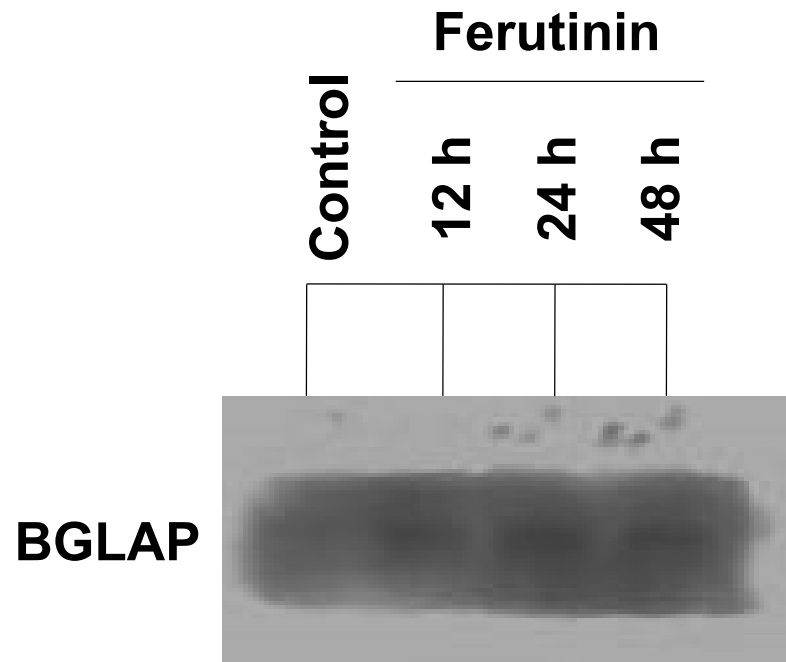

**Figure 1**

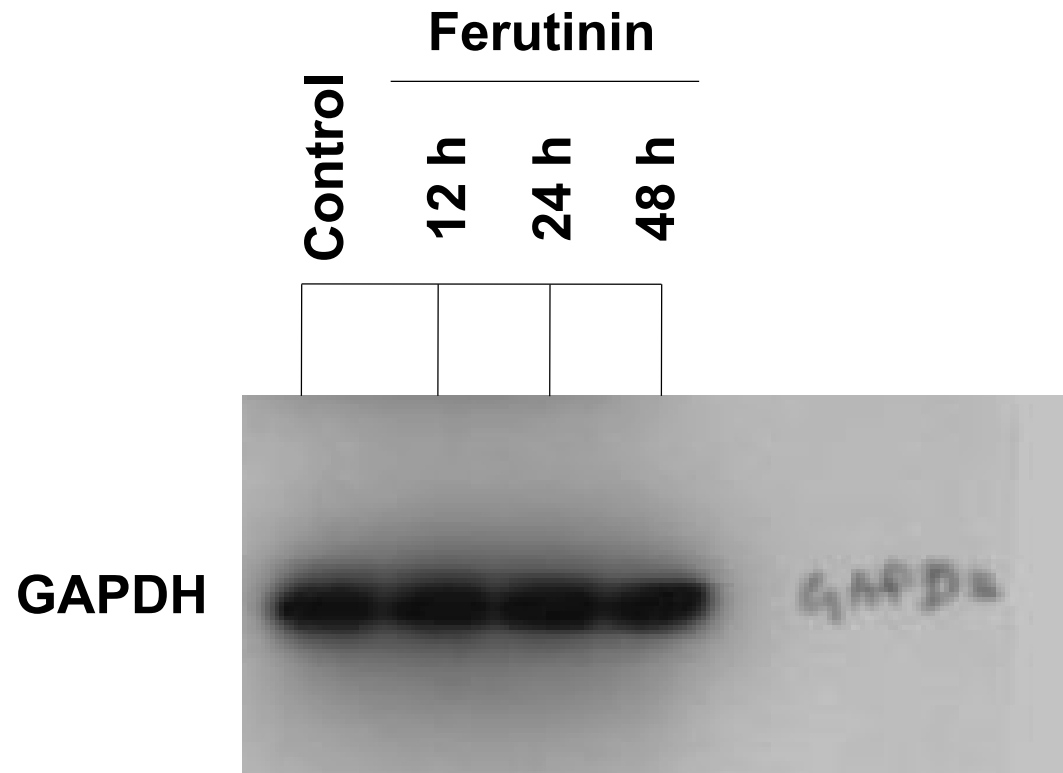

Figure 1











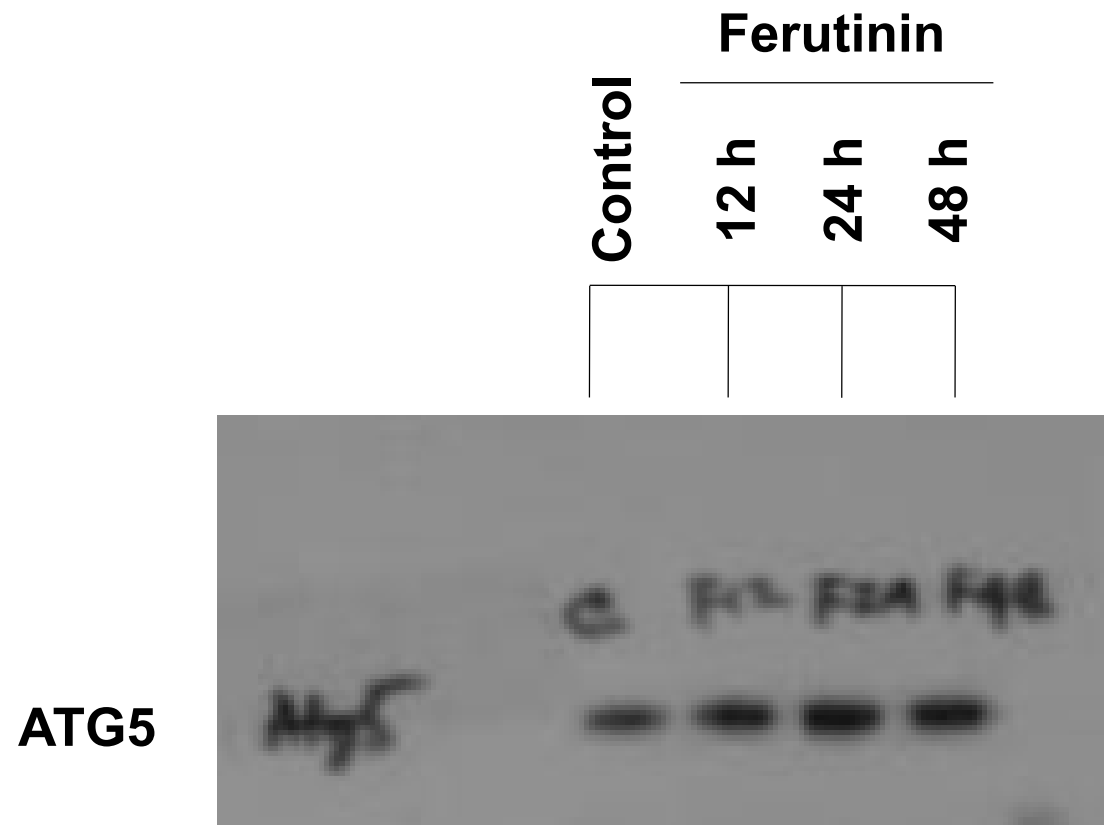

**Figure 2B**

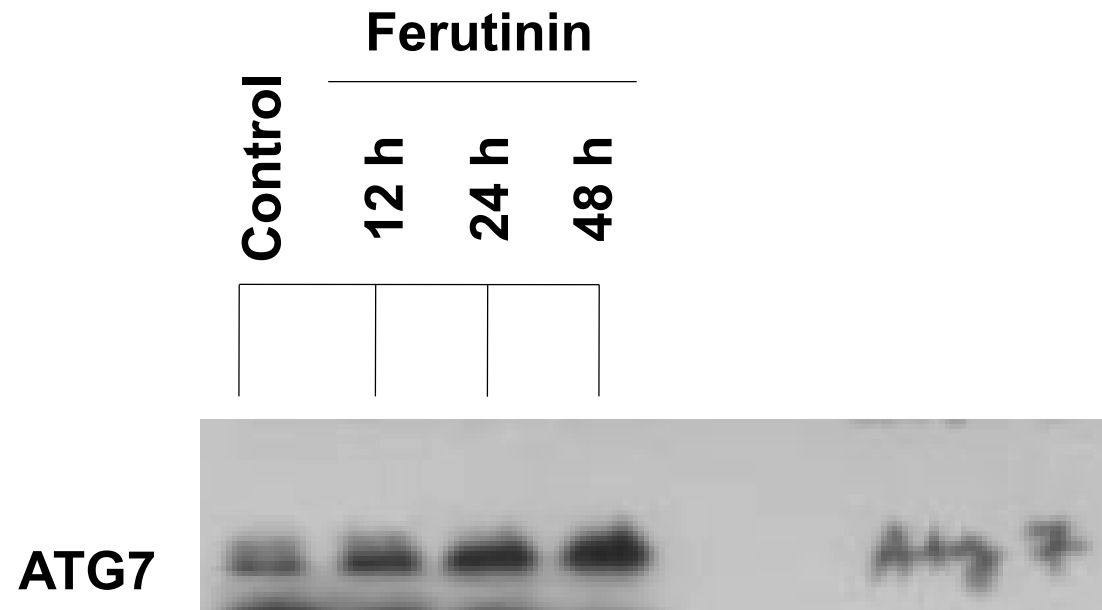

Figure 2B



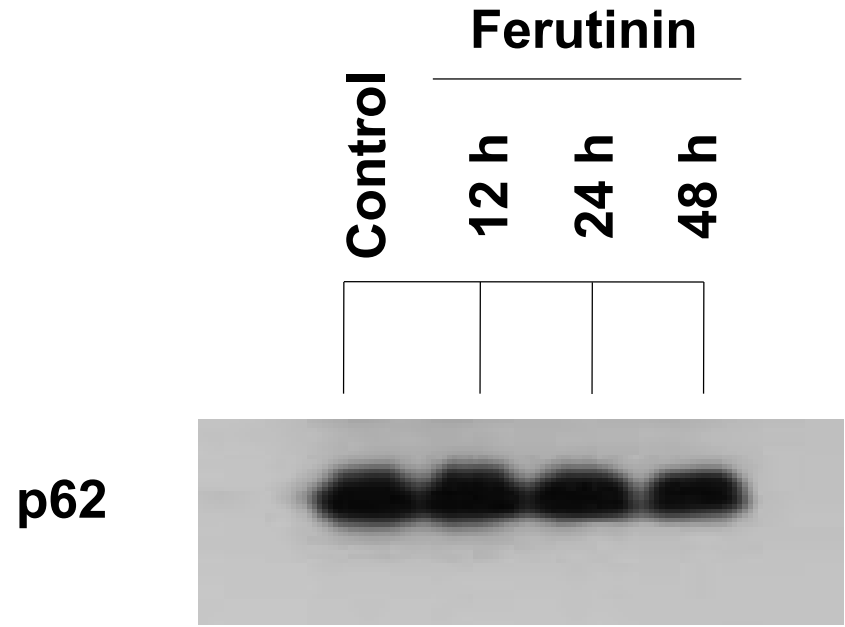

Figure 2B



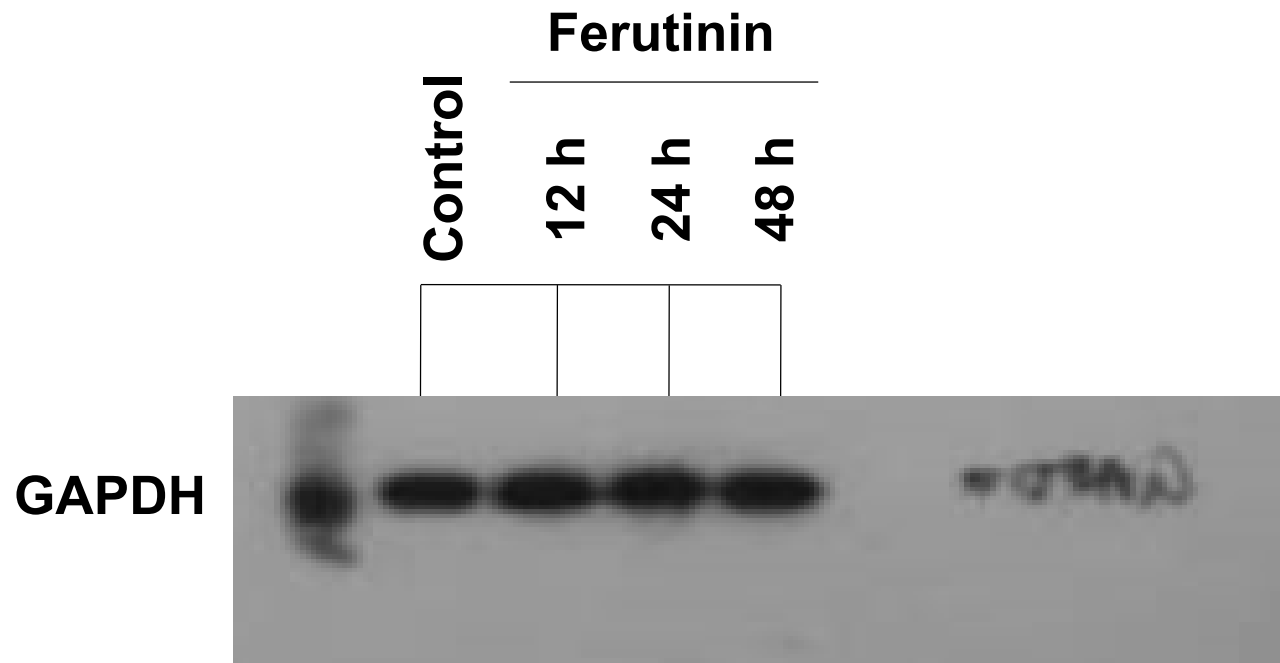

**Figure 2B**

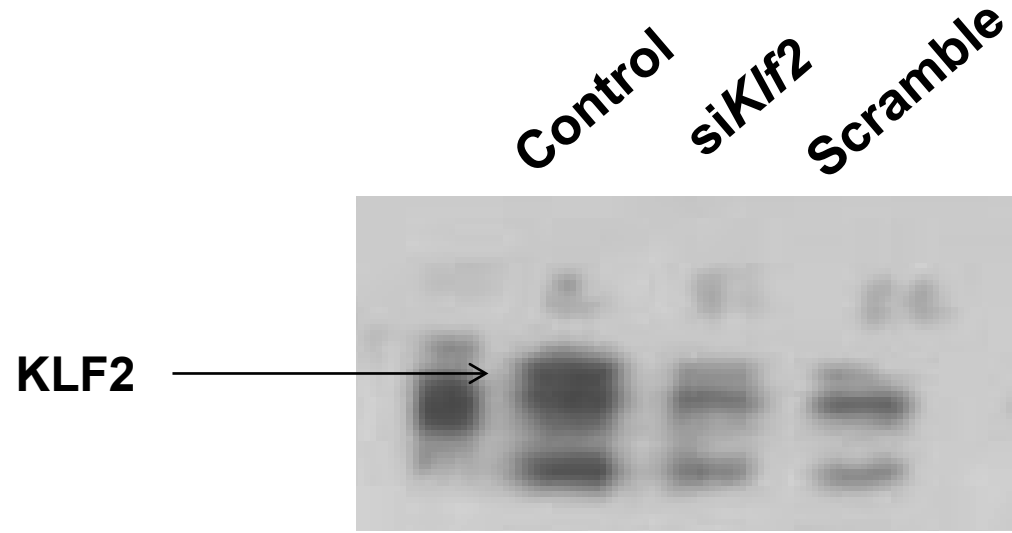

Figure 3A

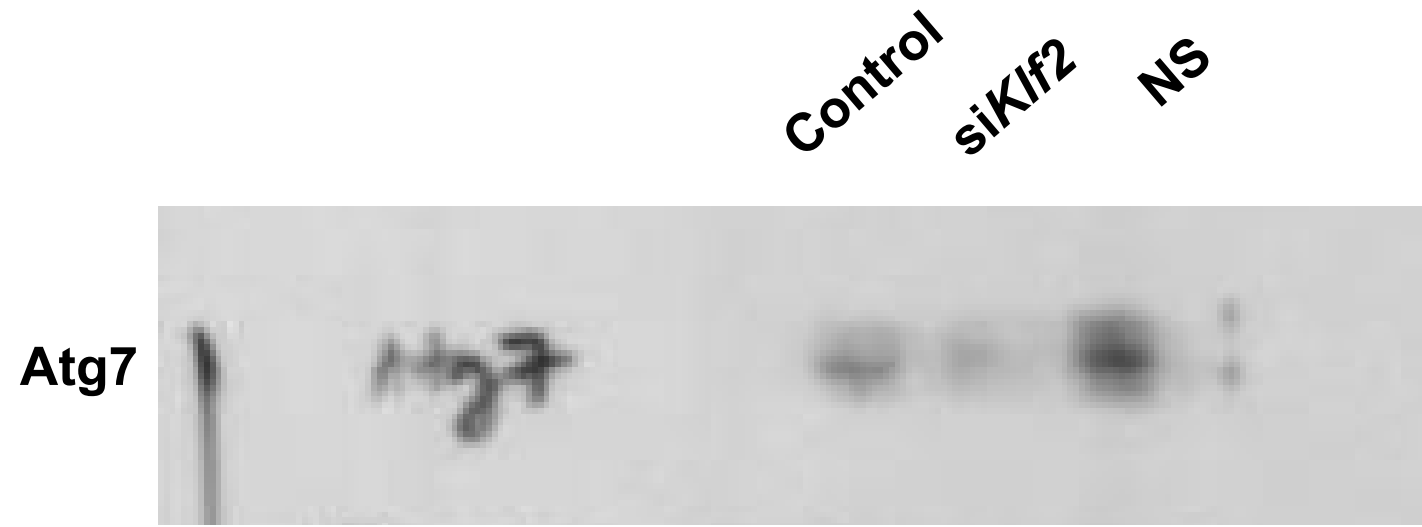

Figure 3A

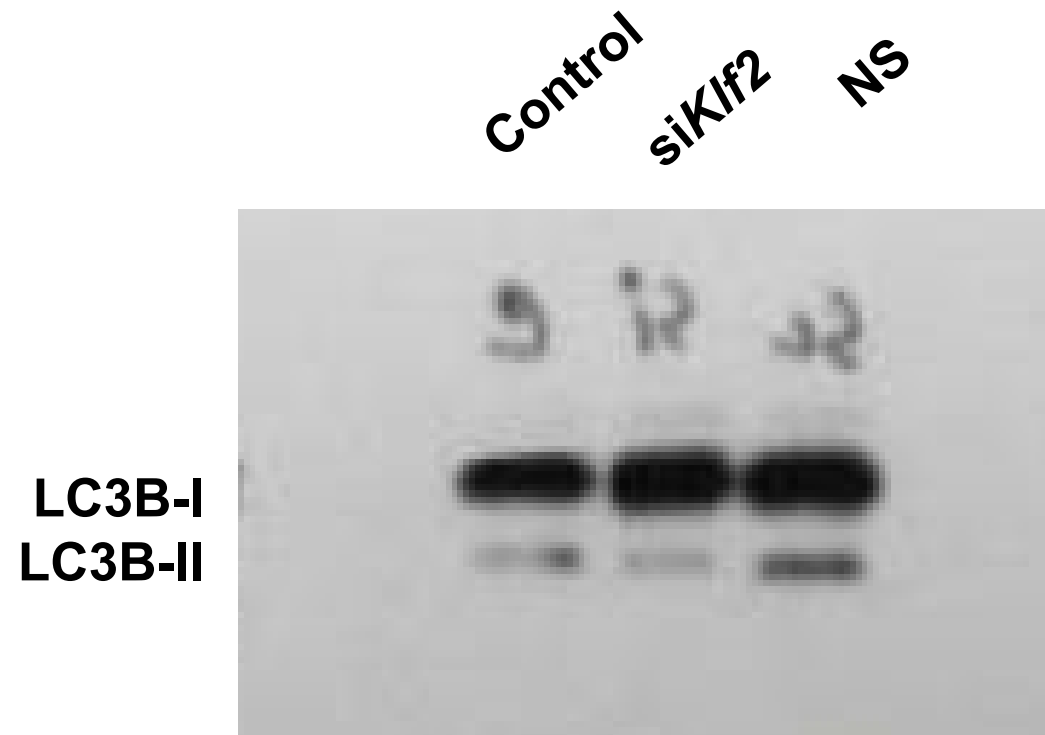

Figure 3A

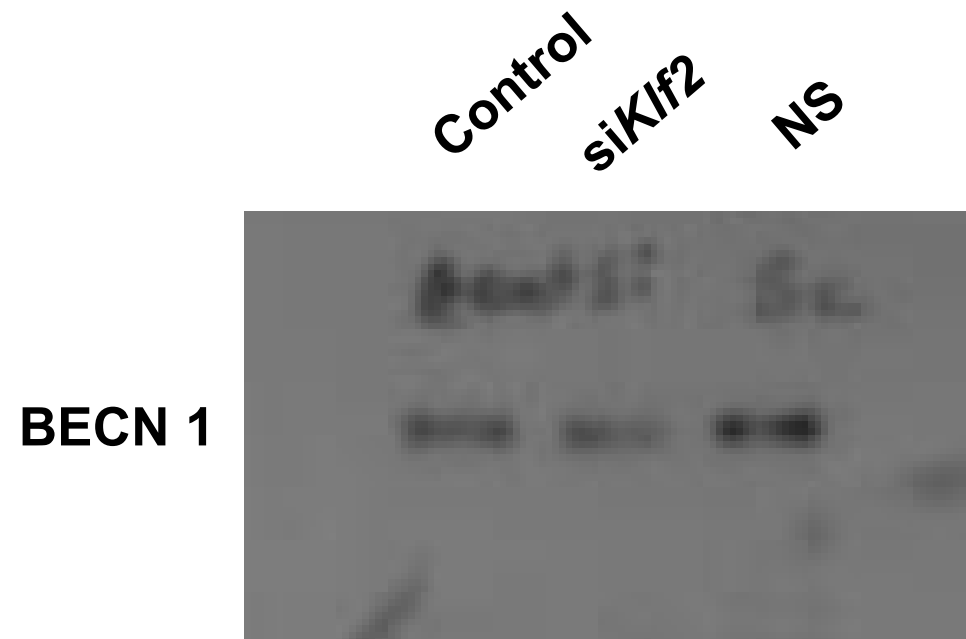

**Figure 3A**

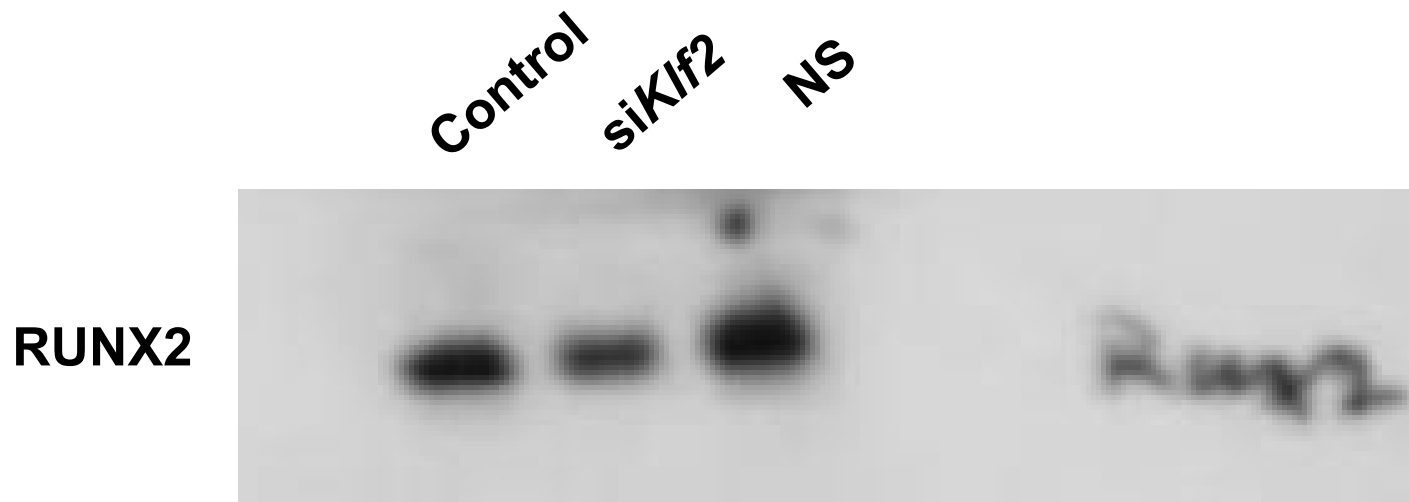

**Figure 3A**

**SPARC**

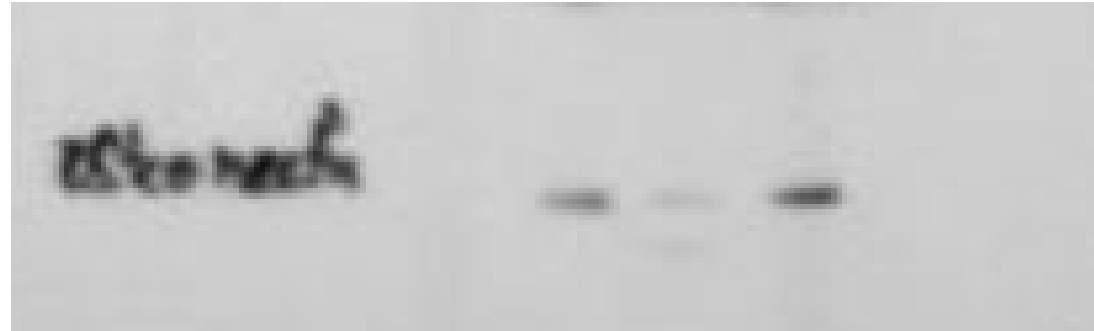

**Control**  
**siKlf2**  
**NS**

**Figure 3A**

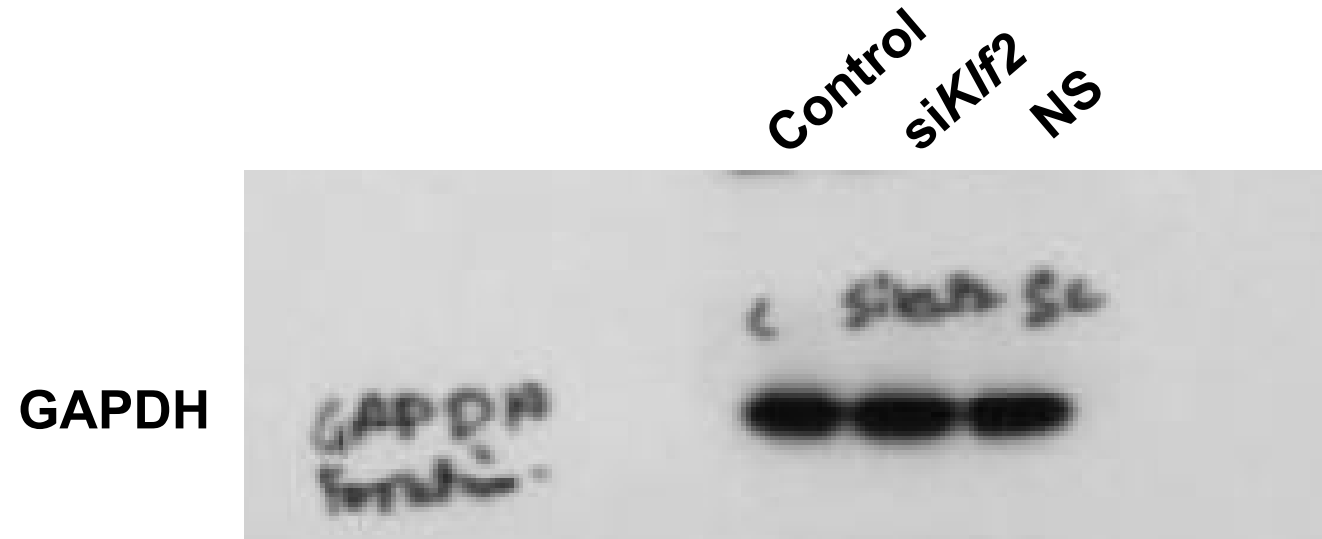

**Figure 3A**



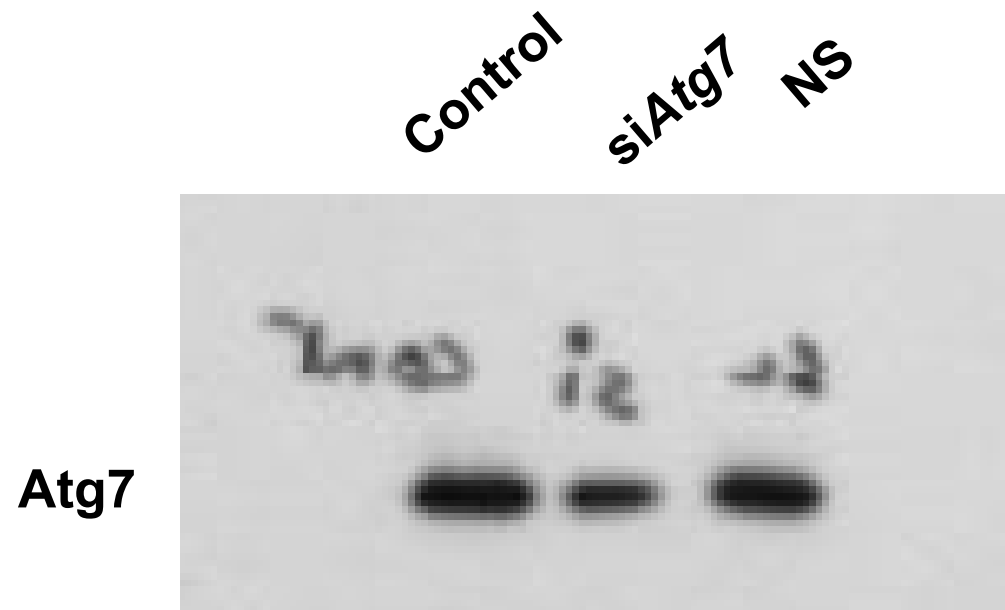

Figure 3B

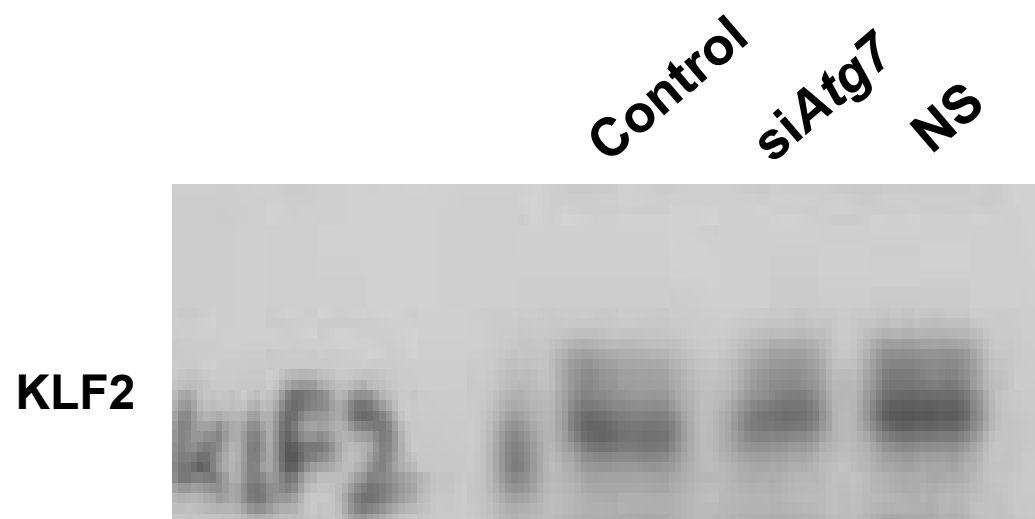

**Figure 3B**

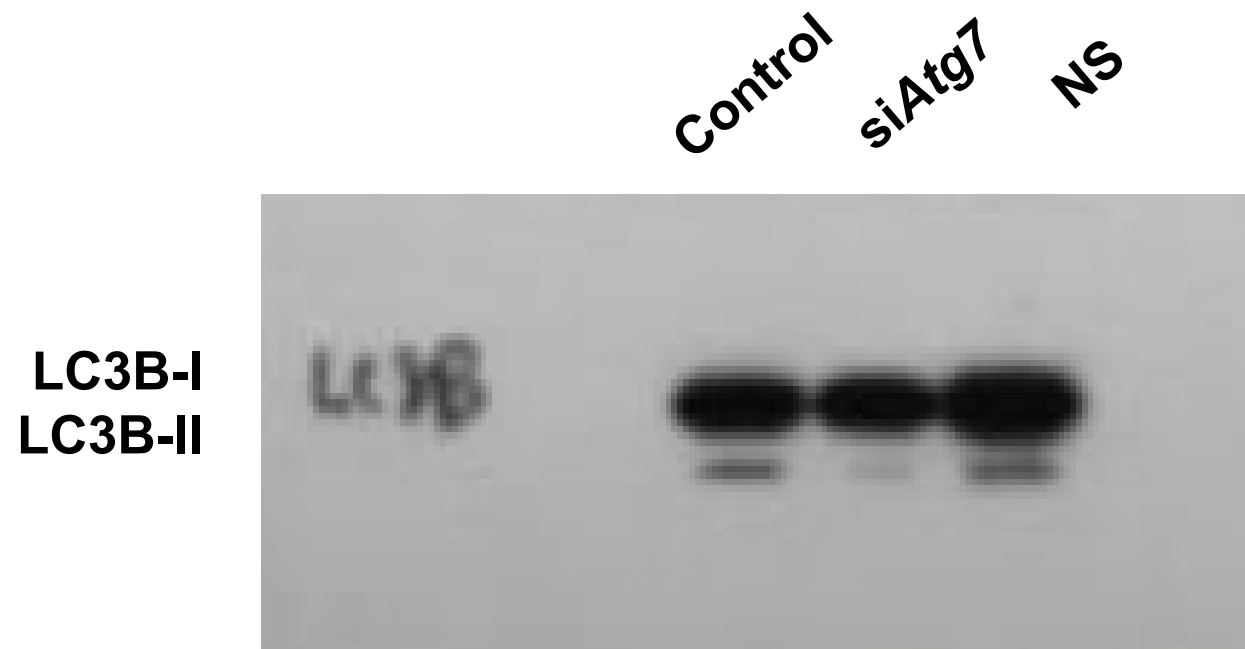

Figure 3B

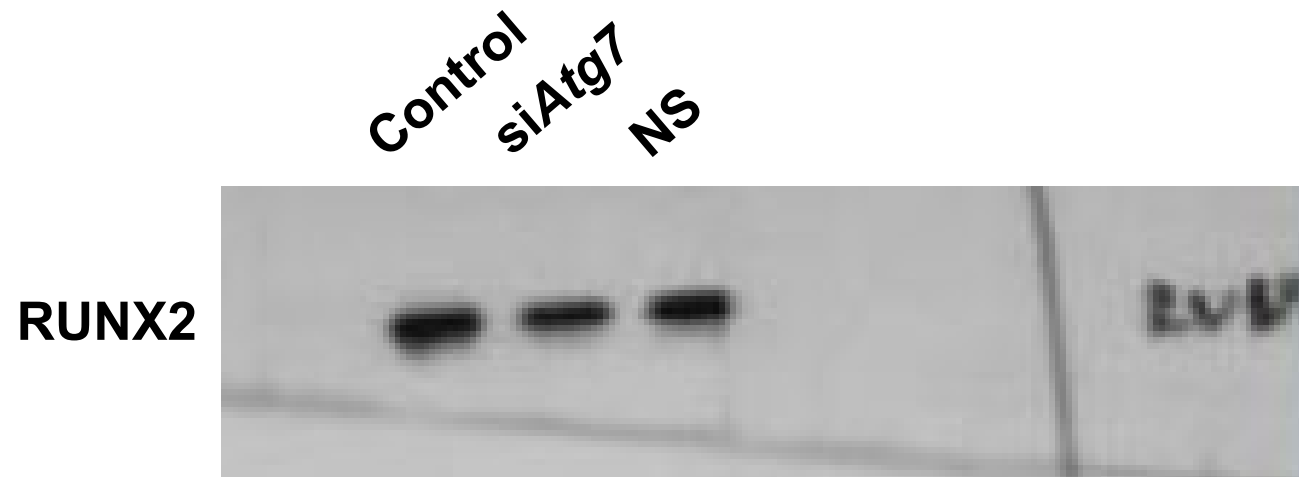

**Figure 3B**

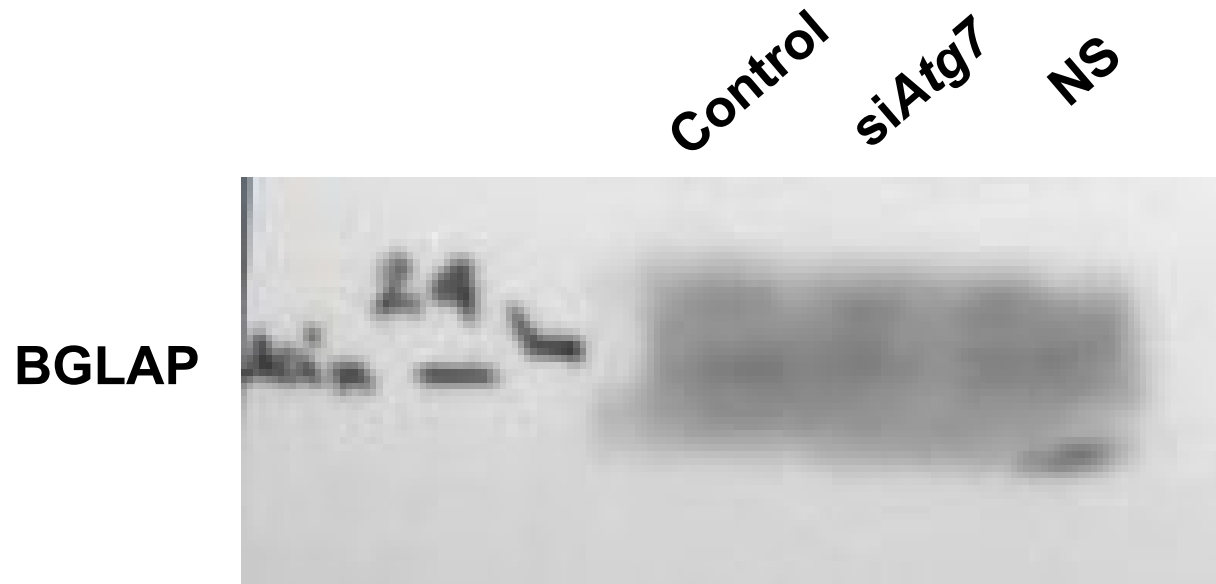

**Figure 3B**

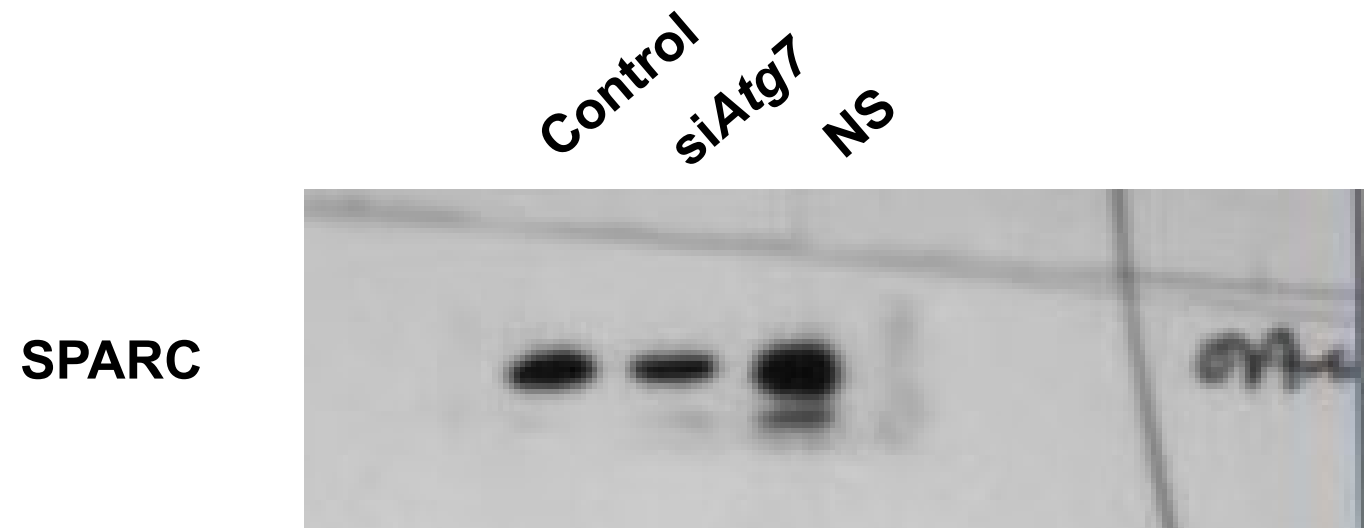

**Figure 3B**

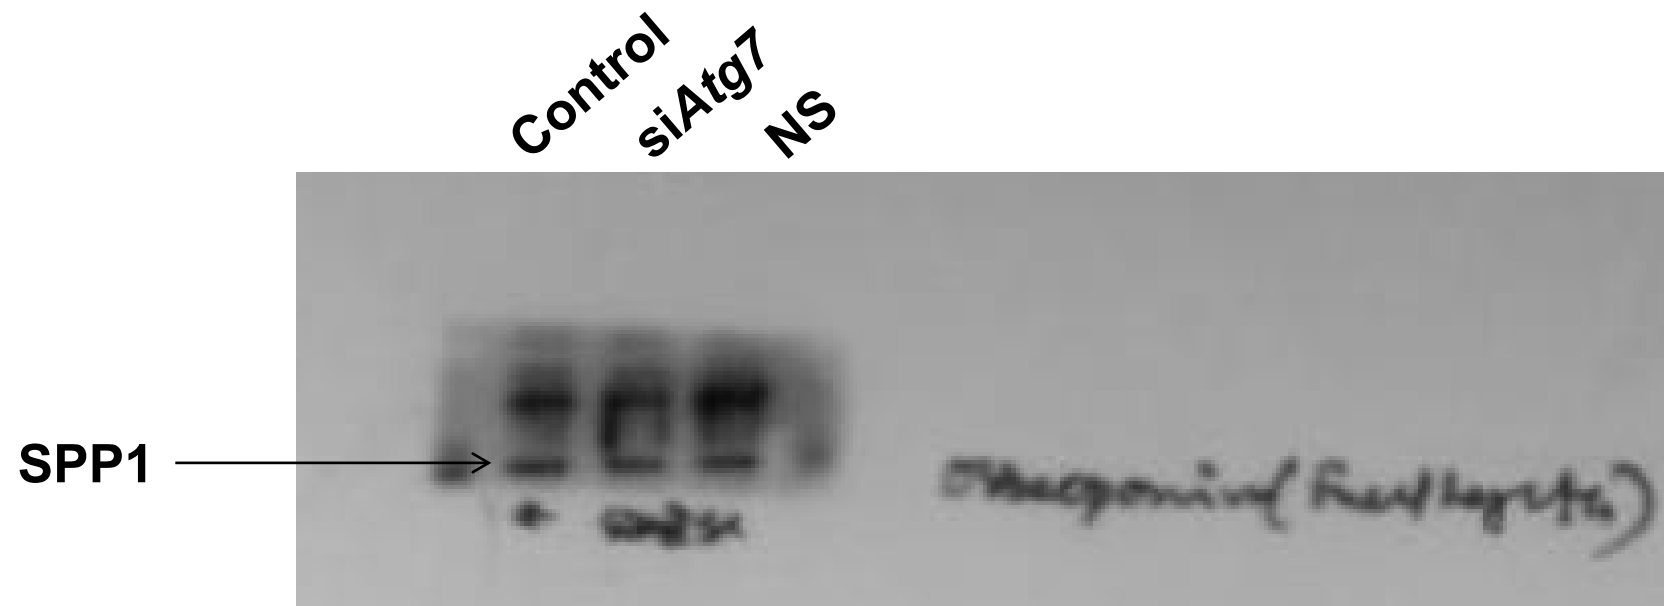

Figure 3B

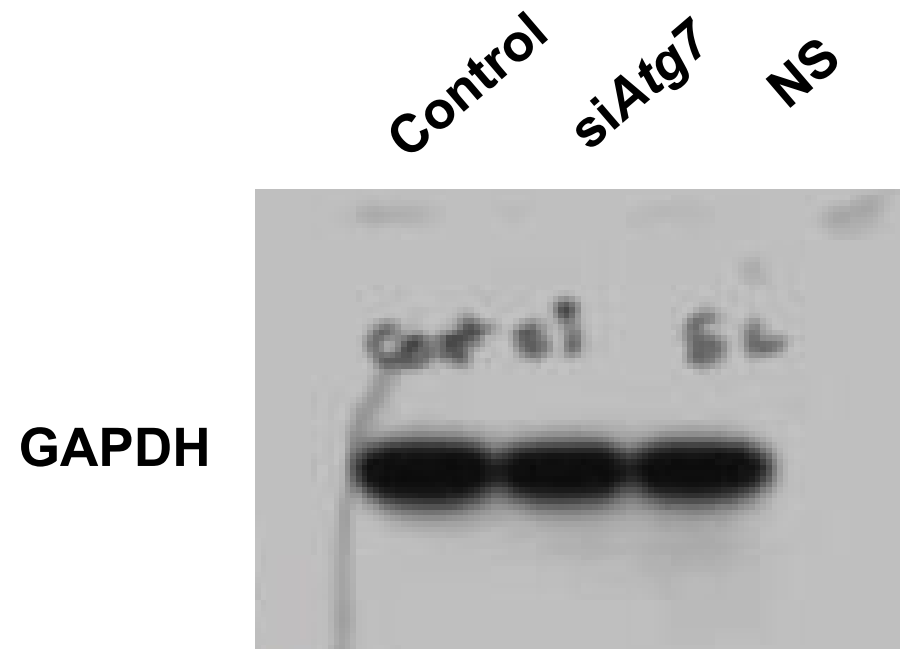

Figure 3B



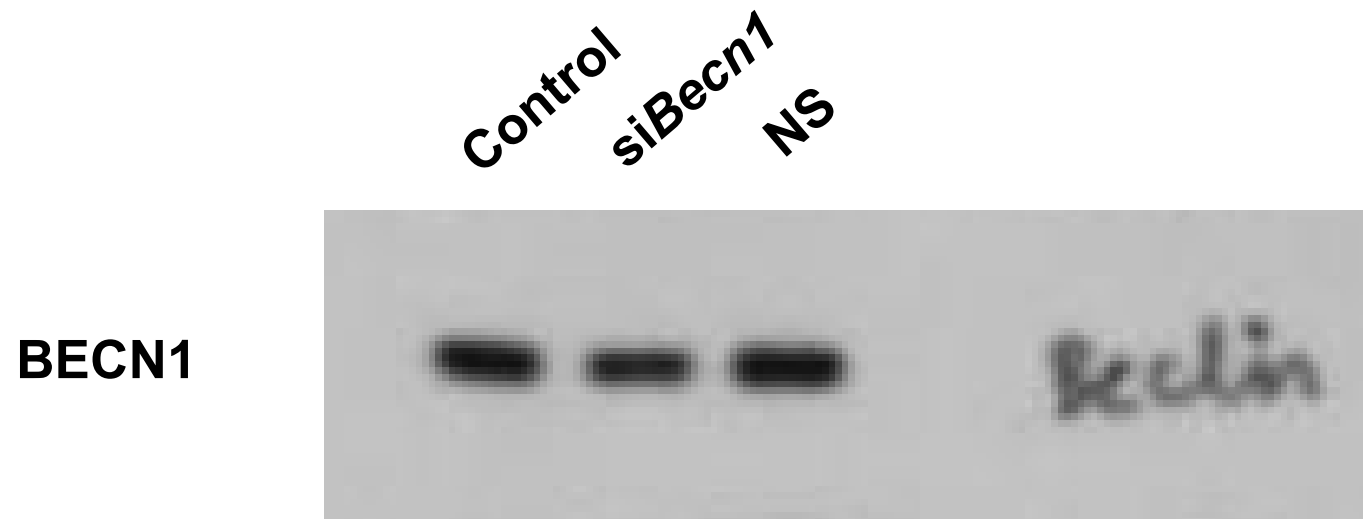

**Figure 3C**

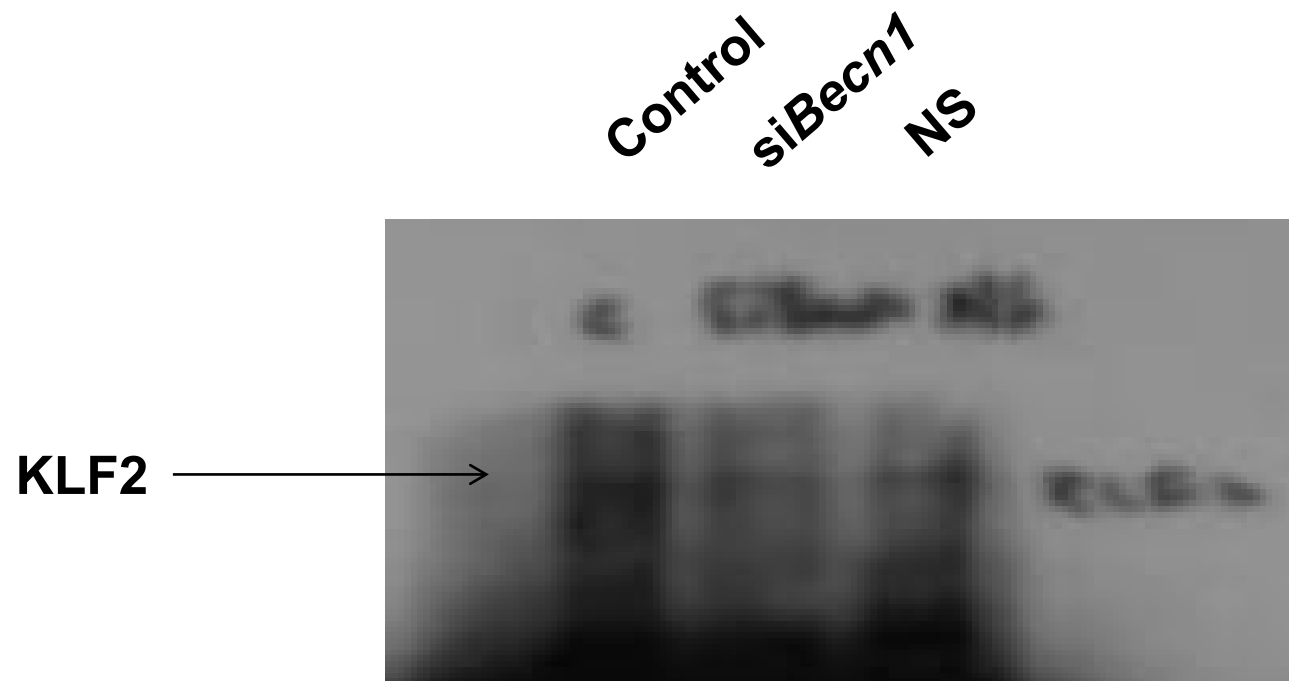

Figure 3C

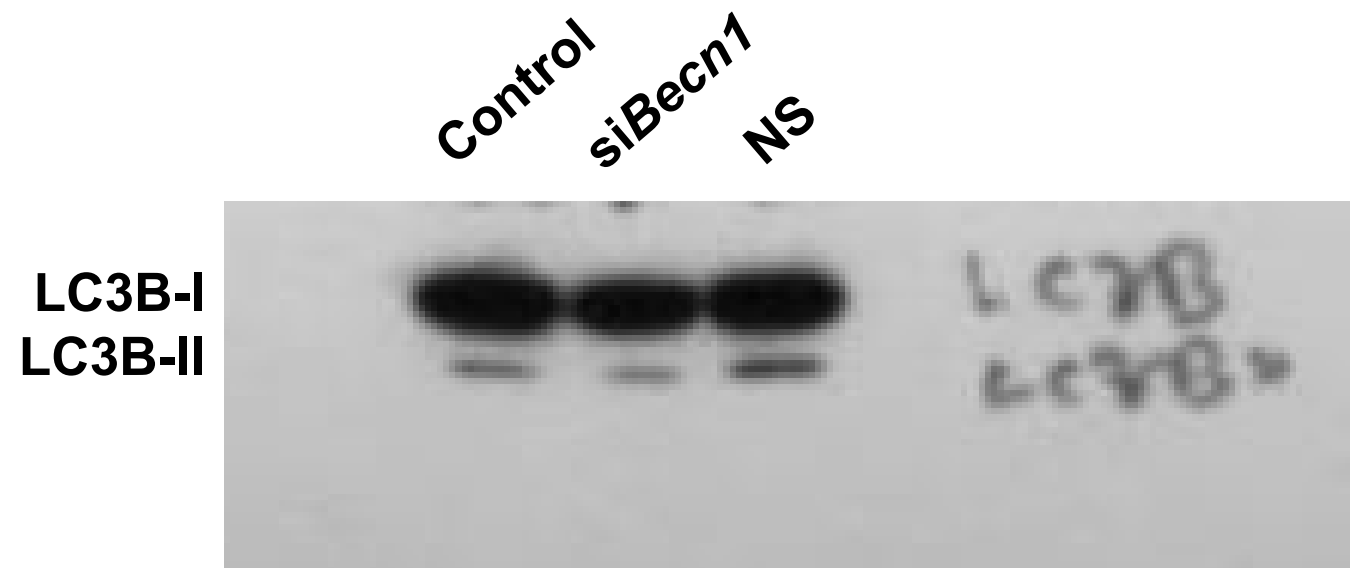

Figure 3C

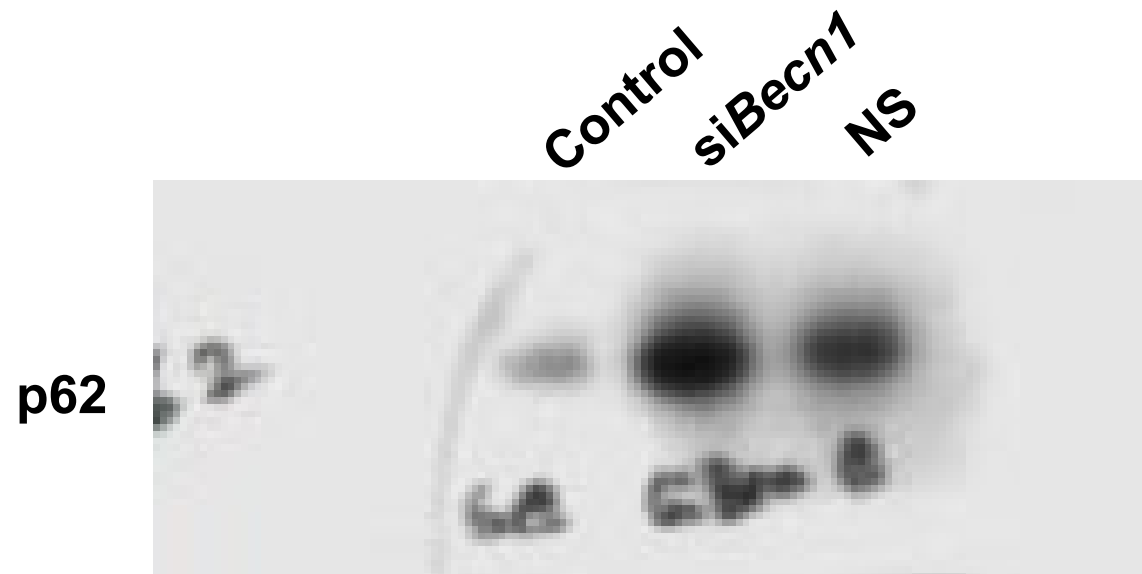

**Figure 3C**

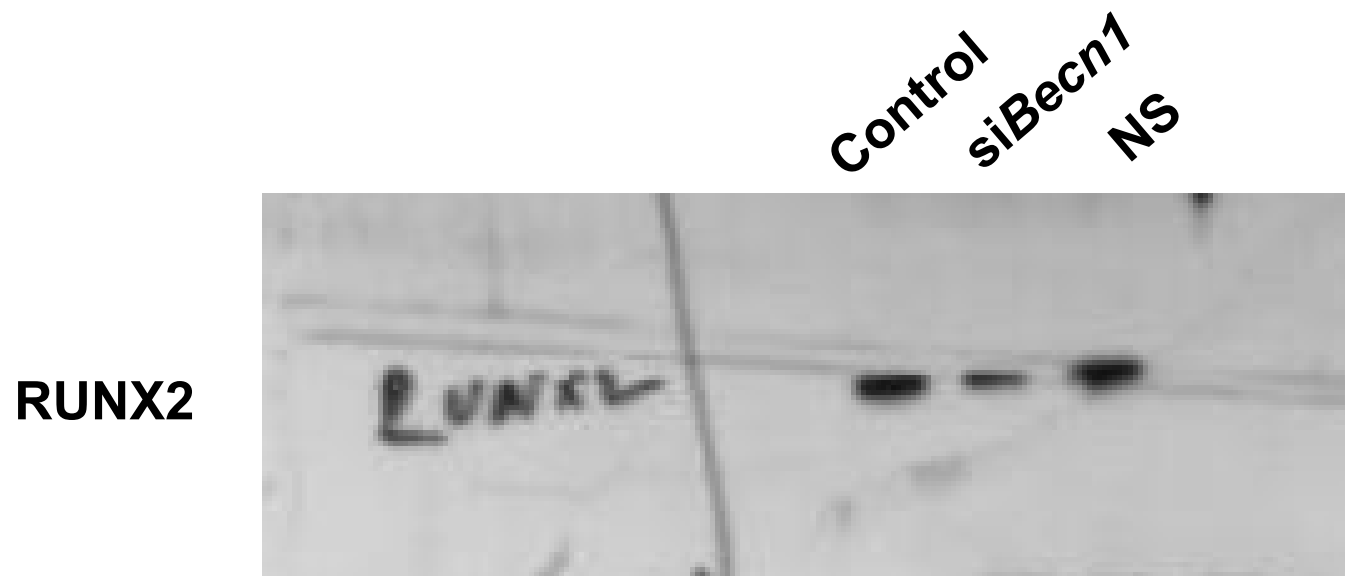

**Figure 3C**

**SPARC**

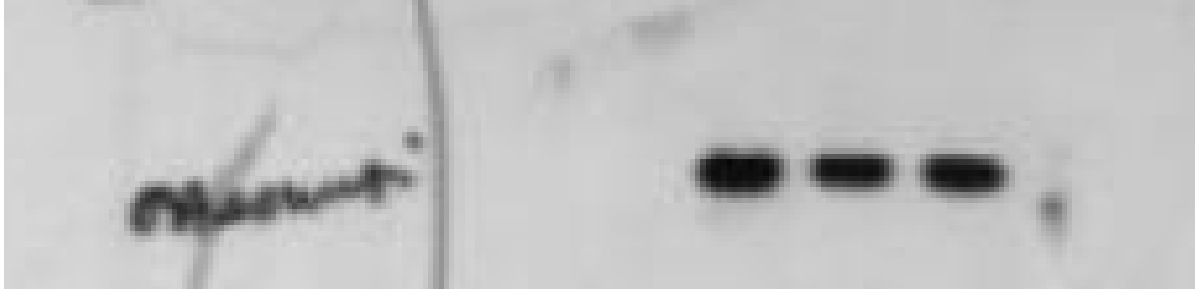

**Control**  
**siBecn1**  
**NS**

**Figure 3C**

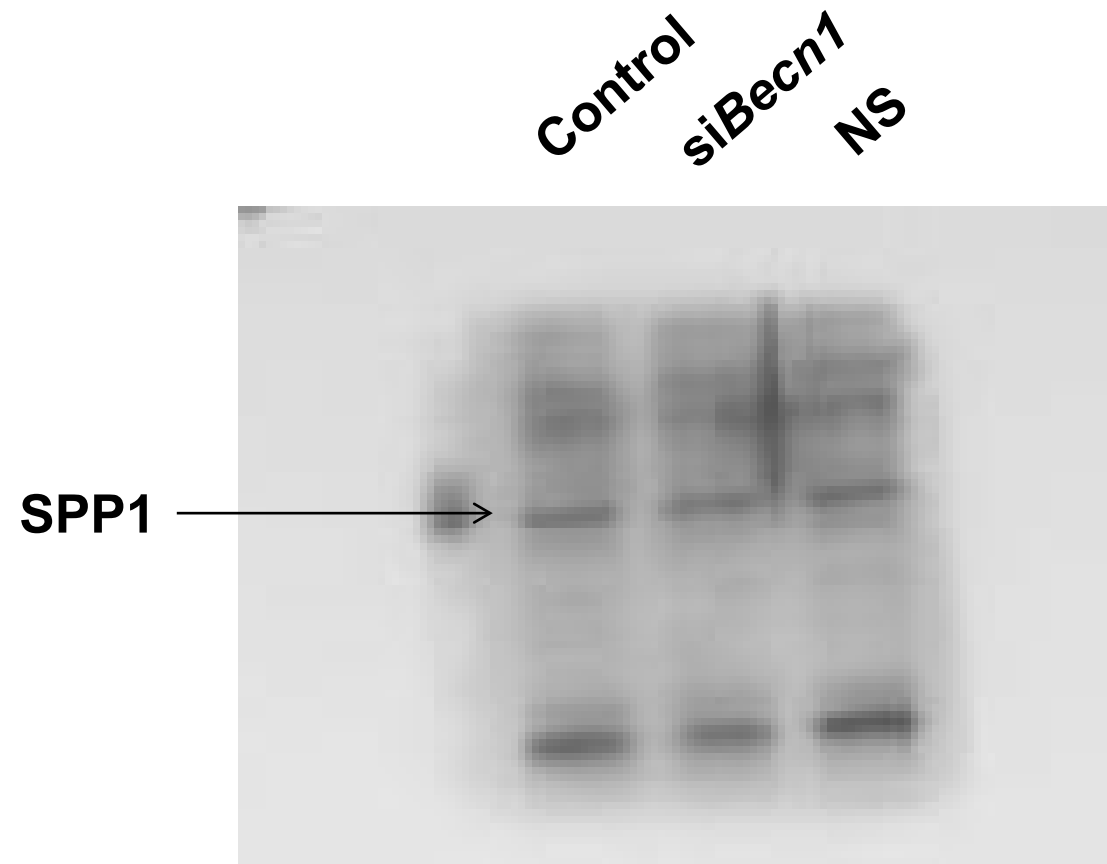

Figure 3C

**GAPDH**

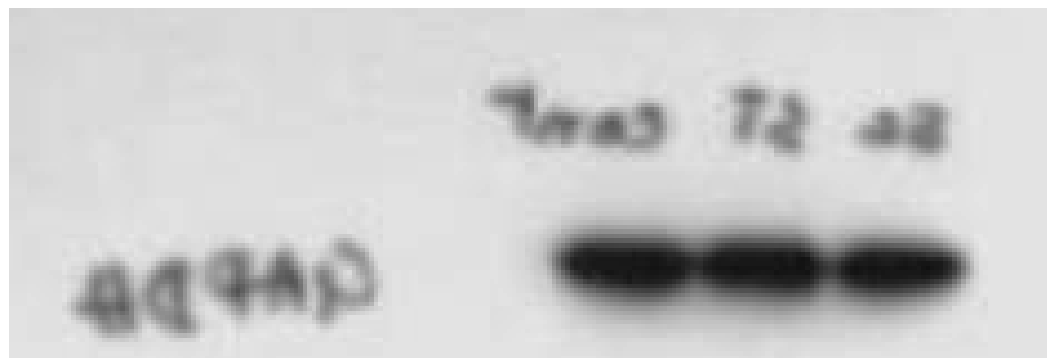

**Figure 3C**



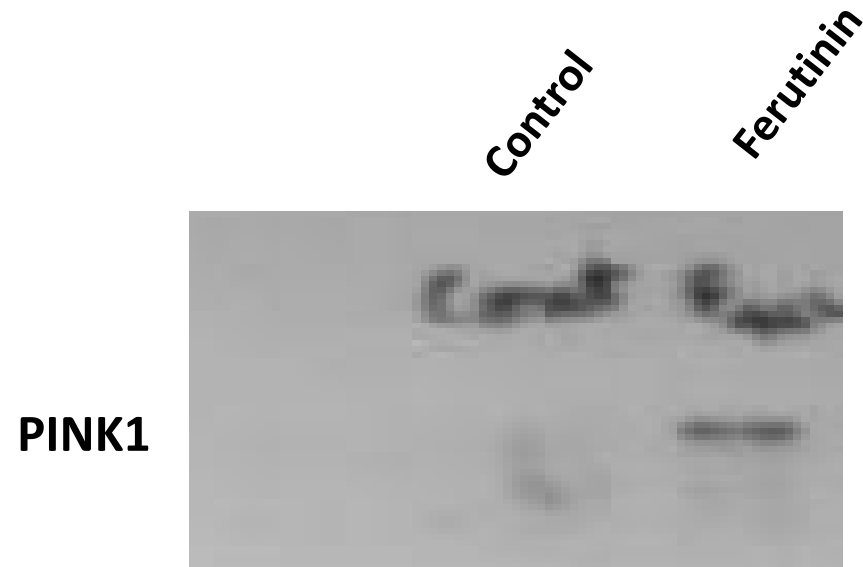

**Figure 5B**

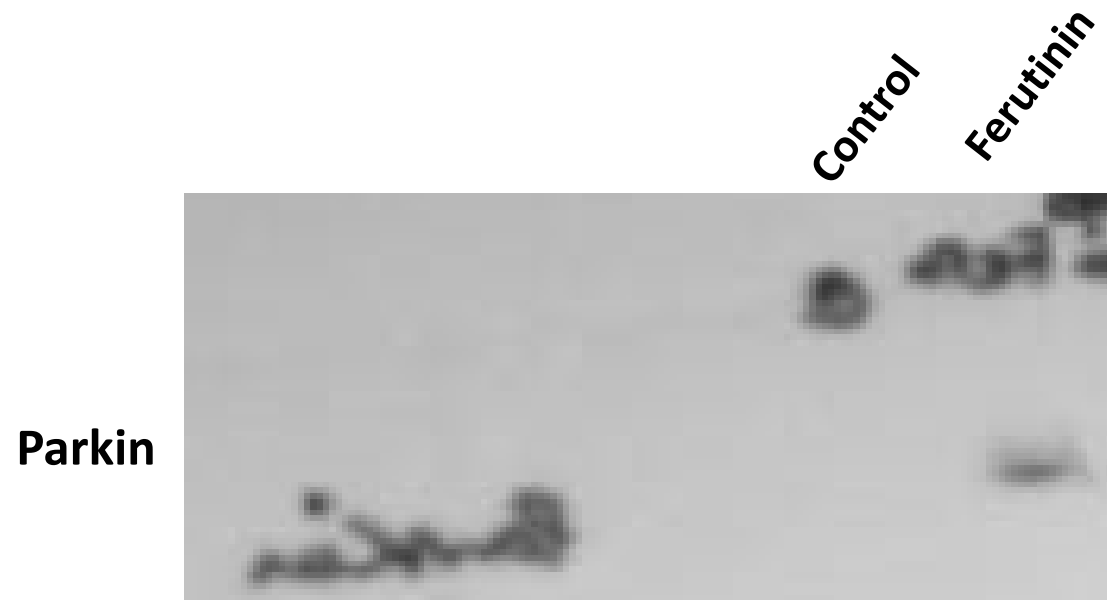

**Figure 5B**

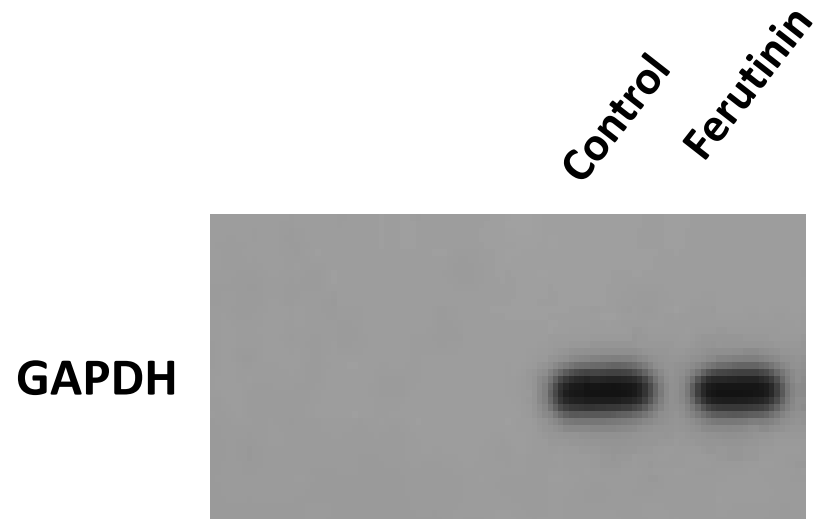

**Figure 5B**
