# Supplementary material for: Ferutinin induces osteoblast differentiation of DPSCs via induction of KLF2 and autophagy/mitophagy
Source: PubMed Central journal article supplement (PMC9098908; doi:10.1038/s41419-022-04903-9), 2022-05-12
Supplement: 41419_2022_4903_MOESM4_ESM.pdf [file 41419_2022_4903_MOESM4_ESM.pdf]

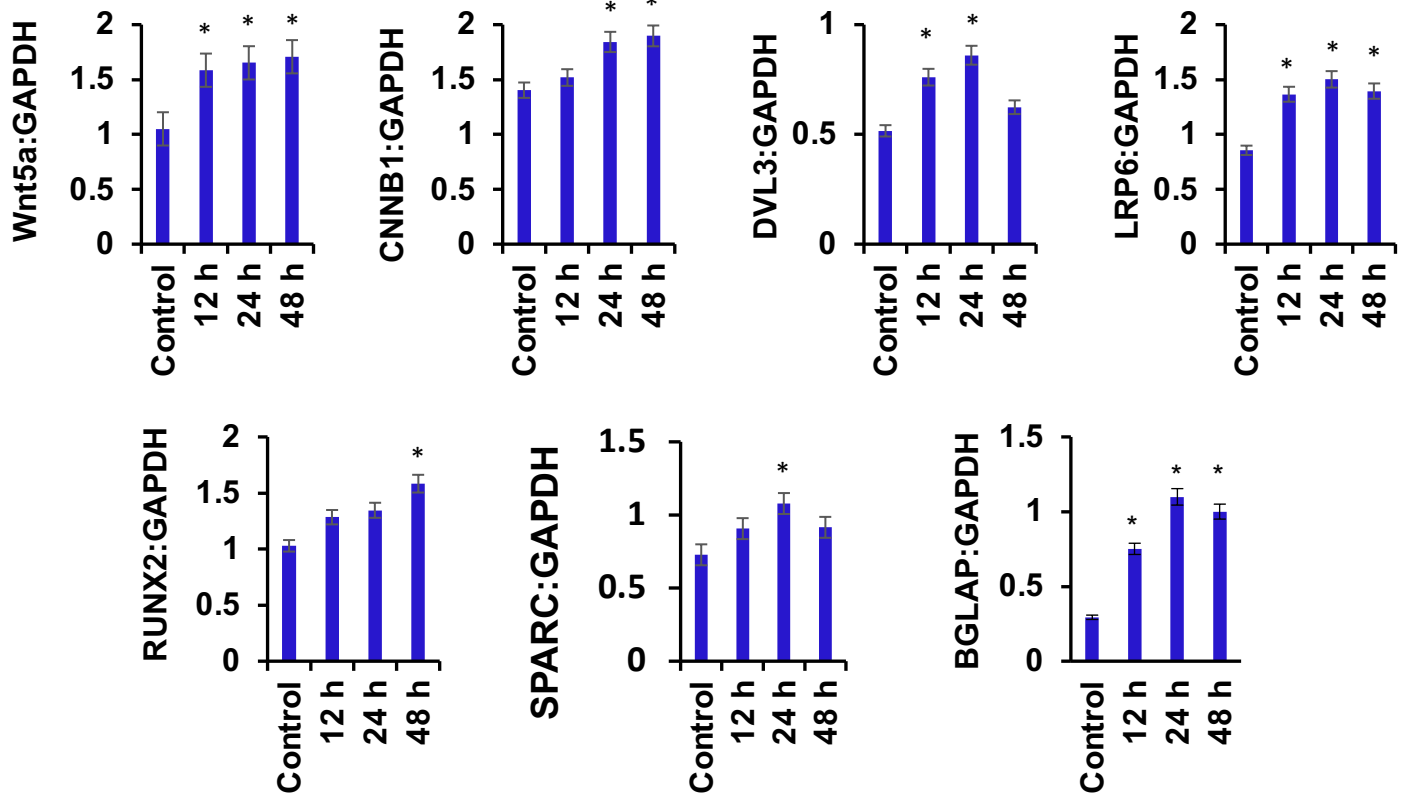

Figure S1

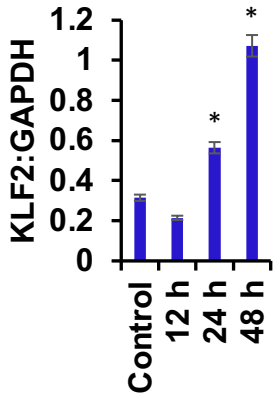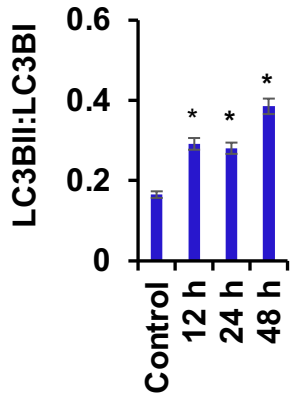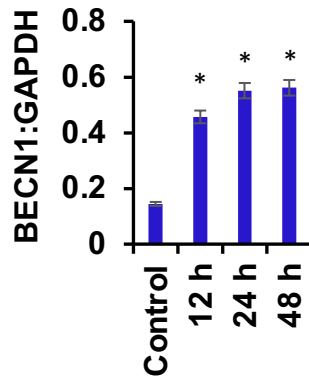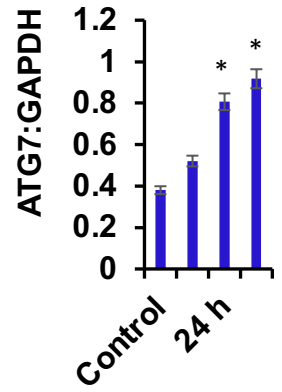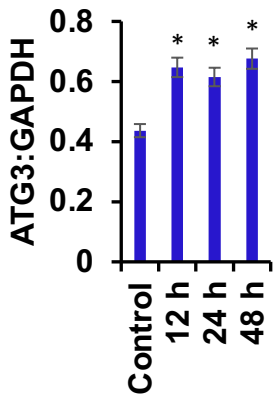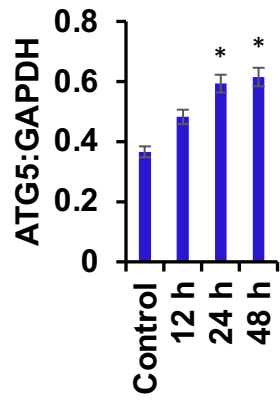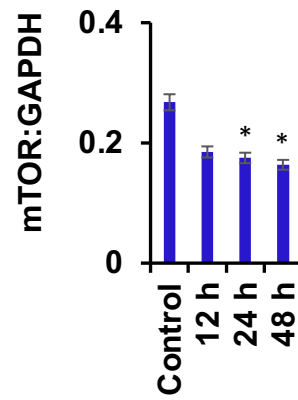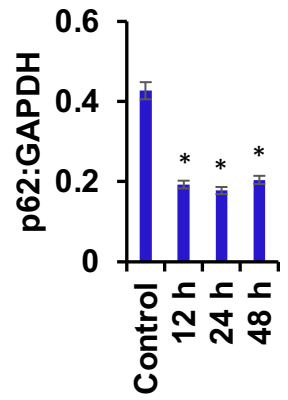

Figure S2

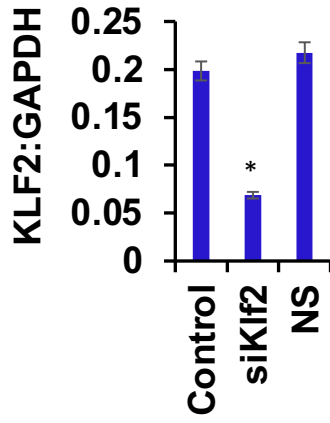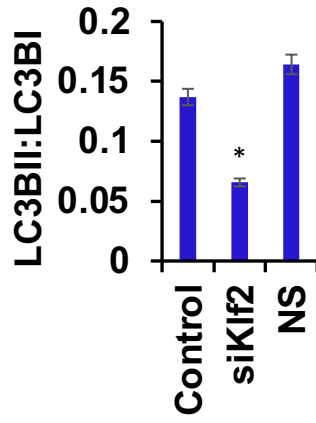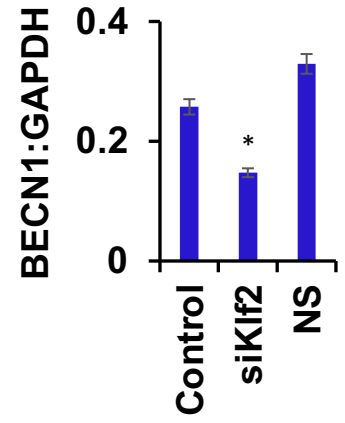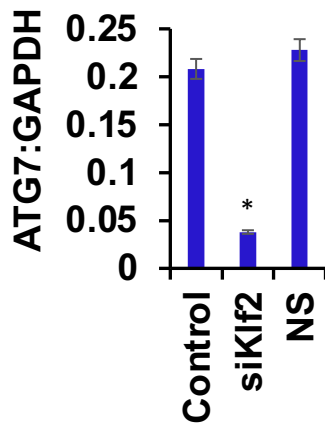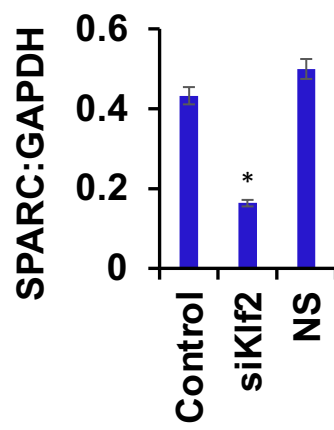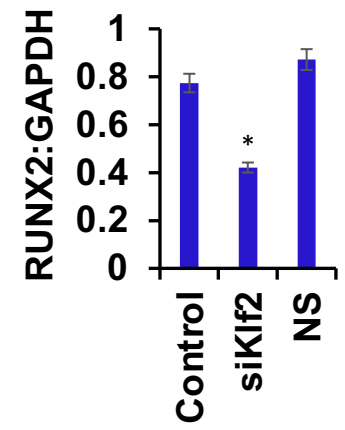

Figure S3

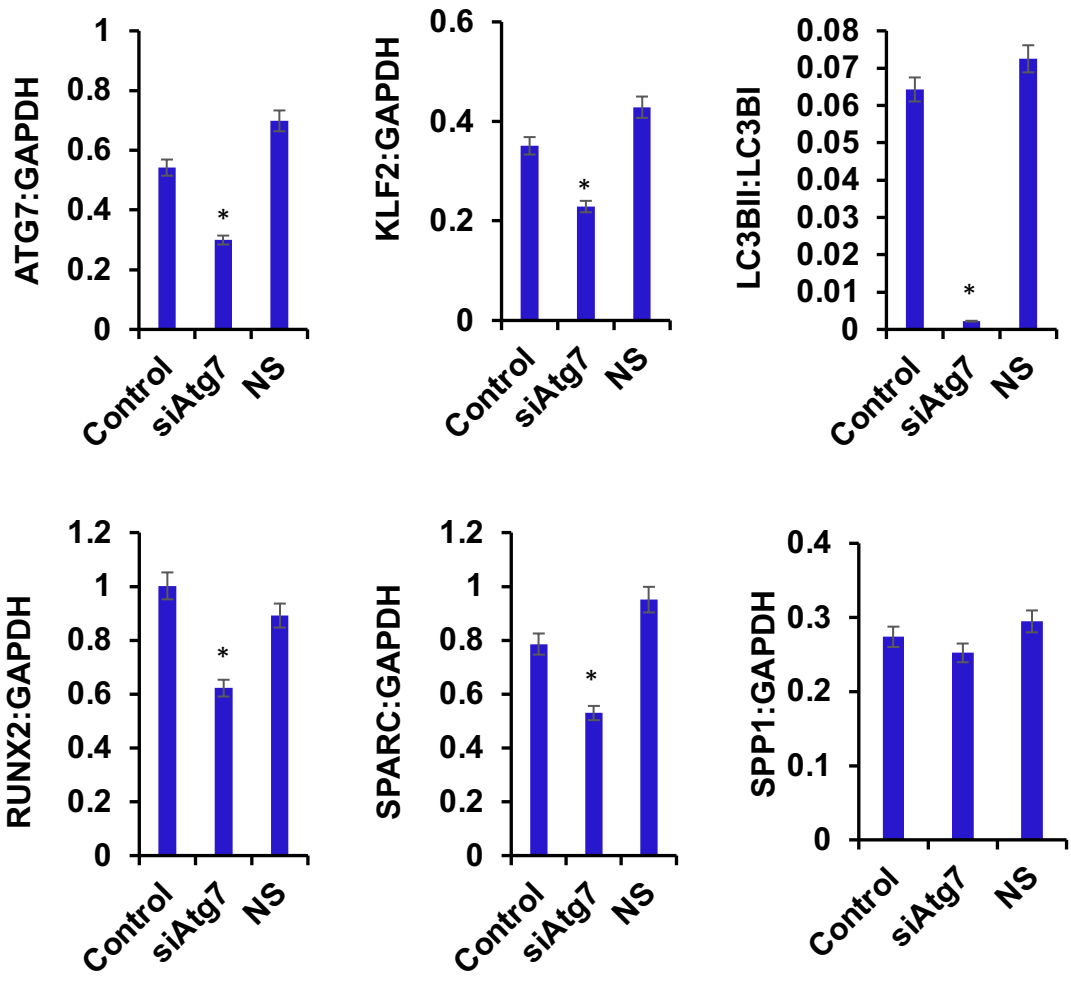

Figure S4

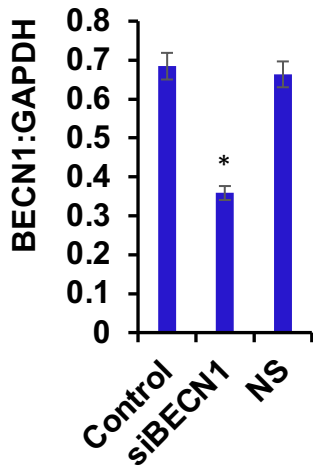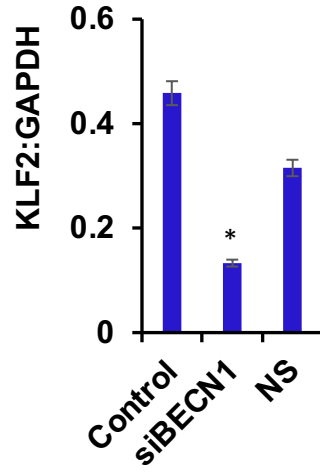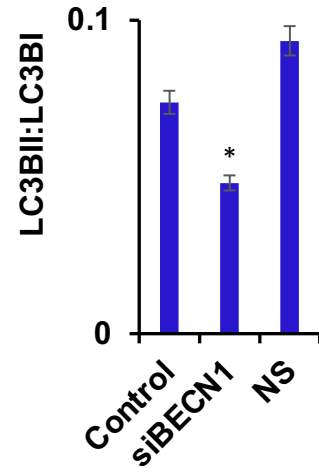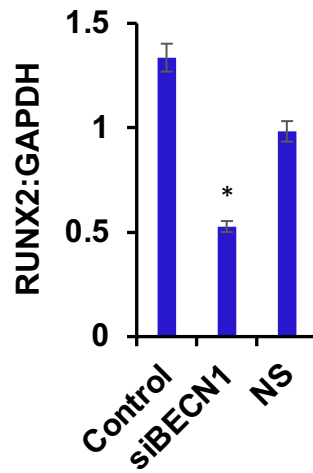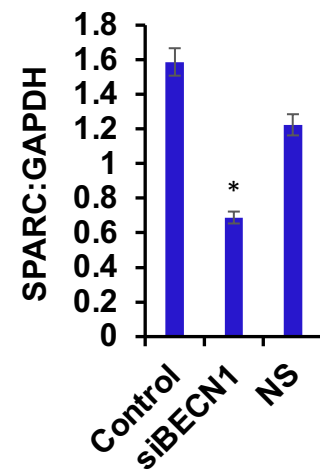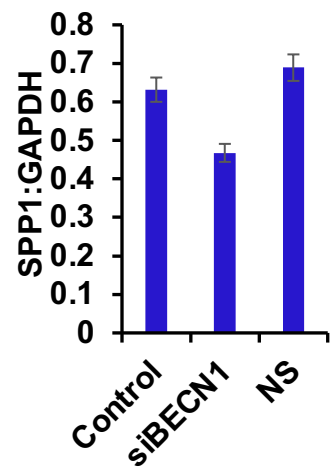

Figure S5

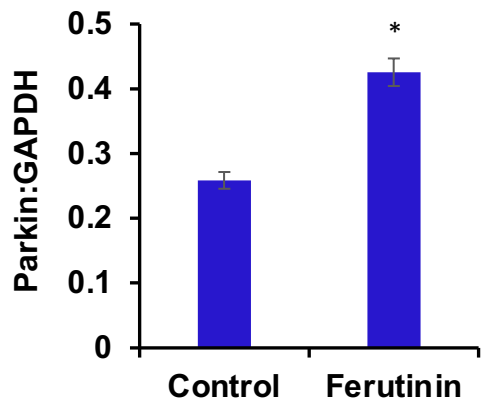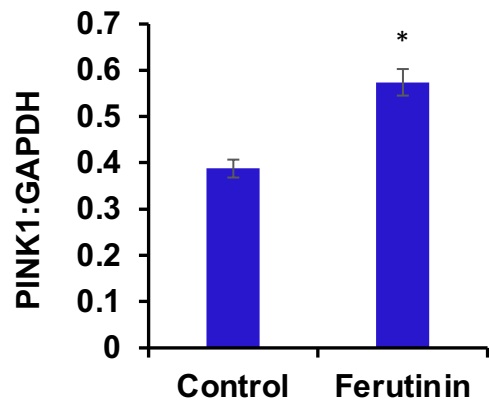

Figure S6

Highlighted regions were used for primer selection for Chromatin immunoprecipitation-PCR analysis

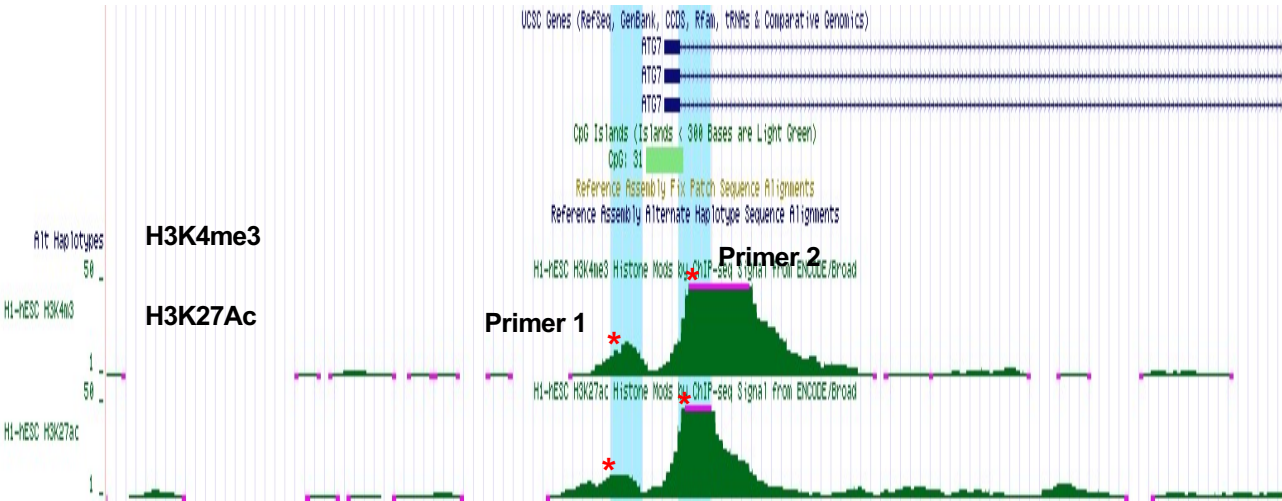

Figure S7

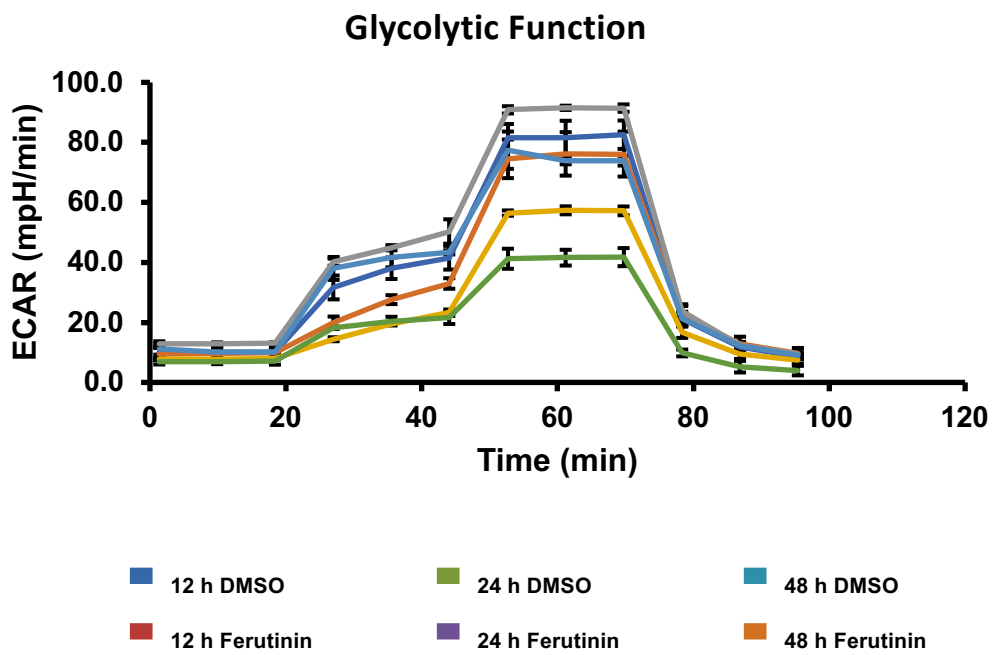

Figure S8



**Table S1.** Primer sequences used in chromatin immunoprecipitation quantitative PCR assays

| <b>Primer</b> | <b>Name</b>           | <b>Sequence</b>       | <b>Genomic location from Human-GRCh37/hg19 assembly</b> |
|---------------|-----------------------|-----------------------|---------------------------------------------------------|
| 1             | <b>ATG7-1 Forward</b> | TTGAGCGGCGGTAAGTGAG   | Chr3:11,313,635-11,313,654                              |
| 2             | <b>ATG7-1 Reverse</b> | CCTGAGACTTGCTGTGACCC  | Chr3:11,313,758-11,313,778                              |
| 3             | <b>ATG7-1 Forward</b> | TTCTCATCTCCTGGCTCTCC  | Chr3:11,314,180-11,314,200                              |
| 4             | <b>ATG7-1 Reverse</b> | TCTCCCTTACCAGATGTCGGA | Chr3:11,314,363- 11,314,384                             |

**Figure S9**
